# Supplementary material
Source: PubMed Central journal article supplement (PMC8813897)
Supplement: NIHMS1758771-supplement-HIP_SupplementaryFigure_final.pdf [file NIHMS1758771-supplement-HIP_SupplementaryFigure_final.pdf]

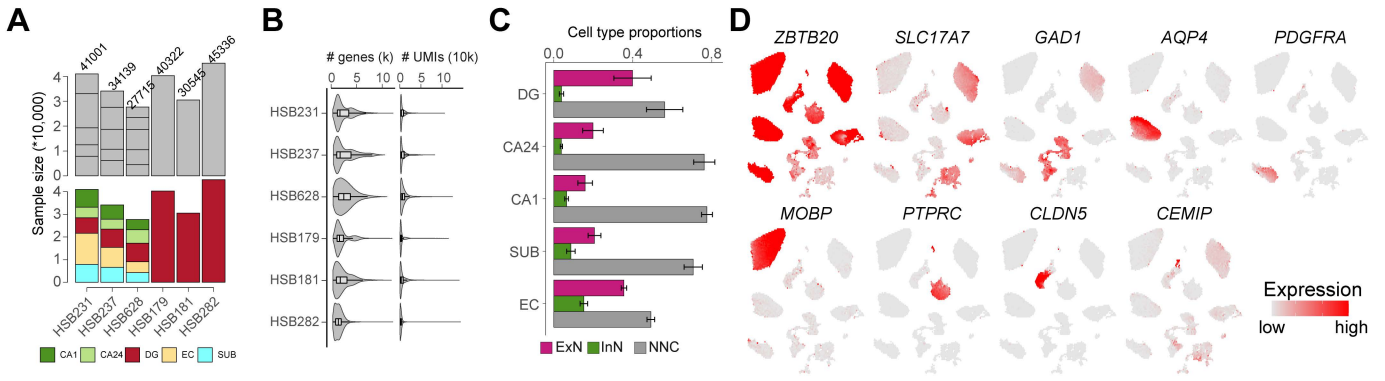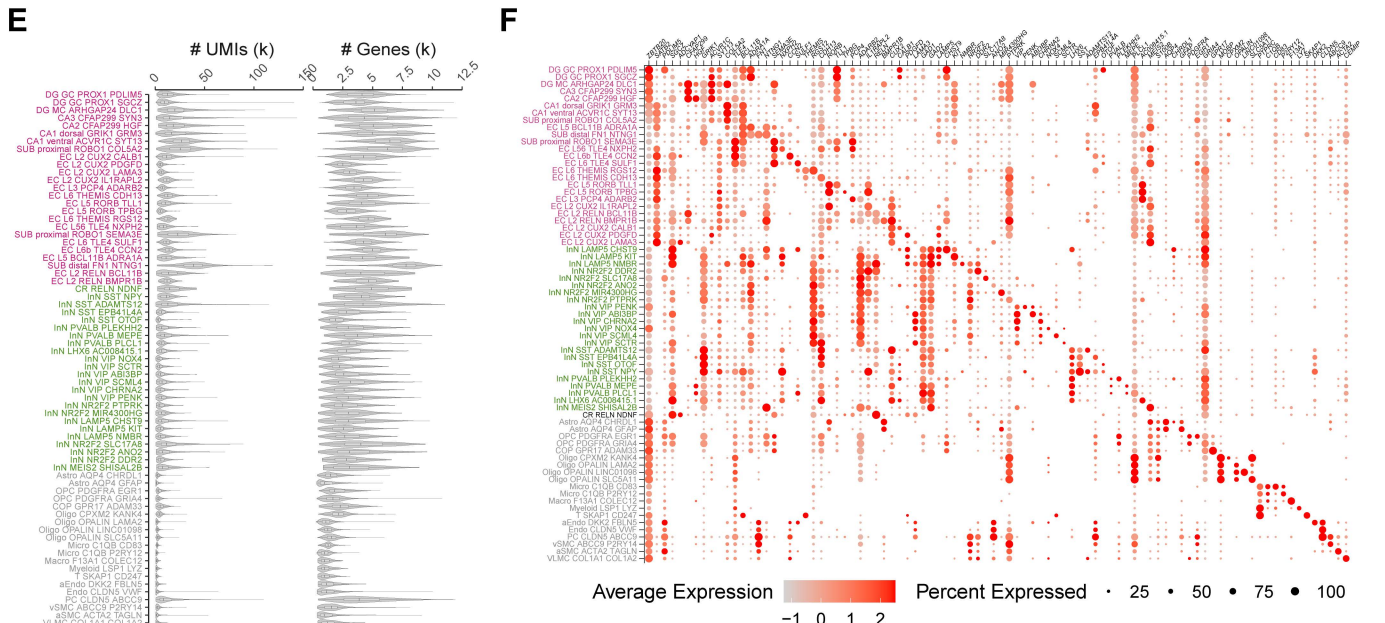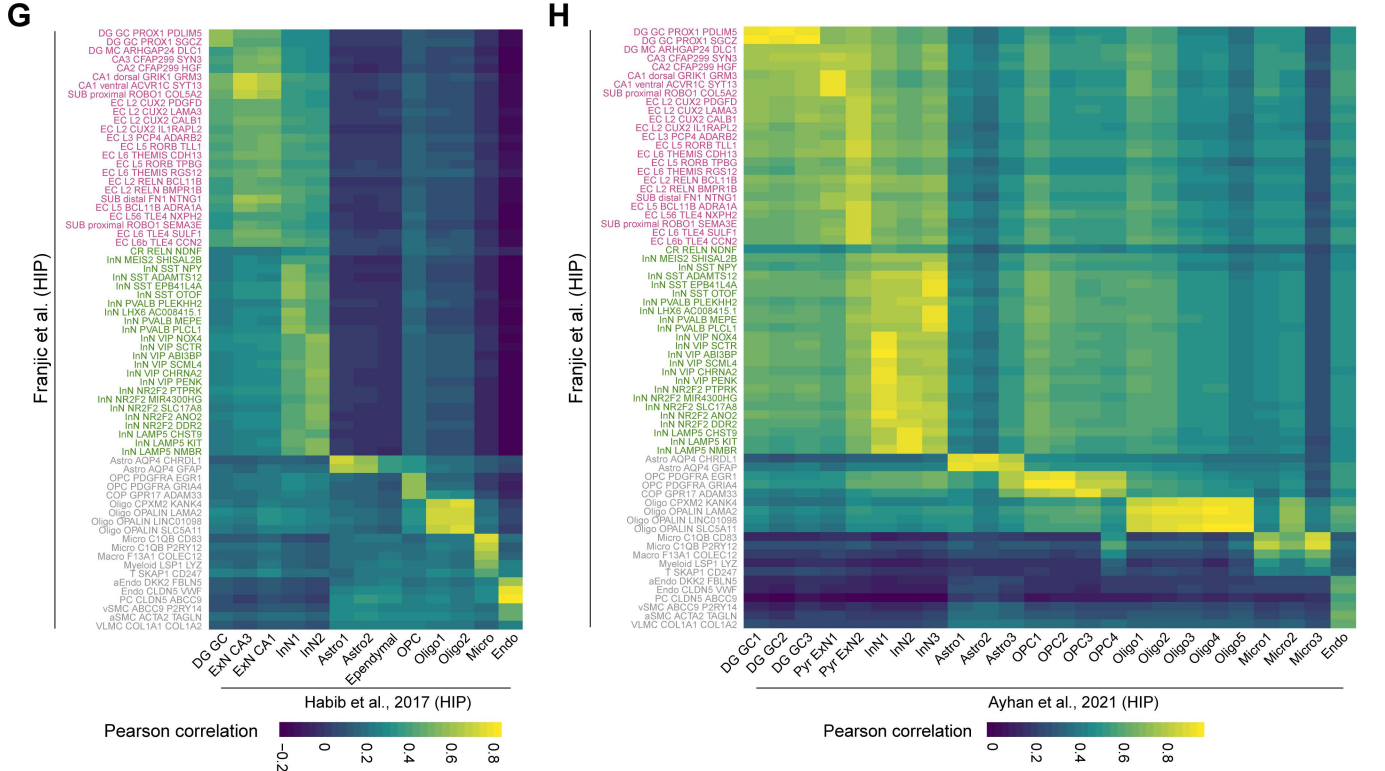

**Figure S1 (related to Figure 1). Overview of data quality and preprocessing.**

**(A)** Bar plot showing the number of cells in each donor (x-axis) with segments representing technical replicates (upper panel) and colors denoting subregions (bottom panel).

**(B)** Violin plot showing the distribution of the number of UMIs and genes detected across donors.

**(C)** Cell type proportions across regions with error bars representing standard error of mean. Although the overall percentages match the expected ratio of 3 to 1 ExN to InN (DeFelipe et al., 2002; Hodge et al., 2019), we found substantial variations in those proportions between different regions.

**(D)** UMAP layout visualizing the expression of major cell type markers.

**(E)** Violin plots displaying the distribution of the number of UMIs and genes across cell subtypes with box plots showing the median, 25th quantiles and 75th quantiles.

**(F)** Dot plots showing the subtype markers.

**(G)** Cell types defined in this dataset (y axis) matched to those previously defined in a published hippocampus dataset (Habib et al., 2017) (x axis), where subregions were not selectively dissected.

**(H)** same as in F, but showing the comparison with the recently published hippocampus data (Ayhan et al., 2021). DG, dentate gyrus; Pyr ExN, pyramidal ExN; EC, entorhinal cortex; Sub, Subiculum. GC, granule cell; MC, mossy cell; Astro, astrocyte; OPC, oligodendrocyte precursor cell; COP, committed oligodendrocyte precursor cell; Oligo, oligodendrocyte; Micro, microglia; Macro, macrophage; Myeloid, myeloid cell; T, T cell; aEndo, arterial endothelial cell; Endo, endothelial cell; PC, pericyte; vSMC, venous smooth muscle cell; aSMC, arterial smooth muscle cell; VLMC, vascular and leptomenigeal cell.

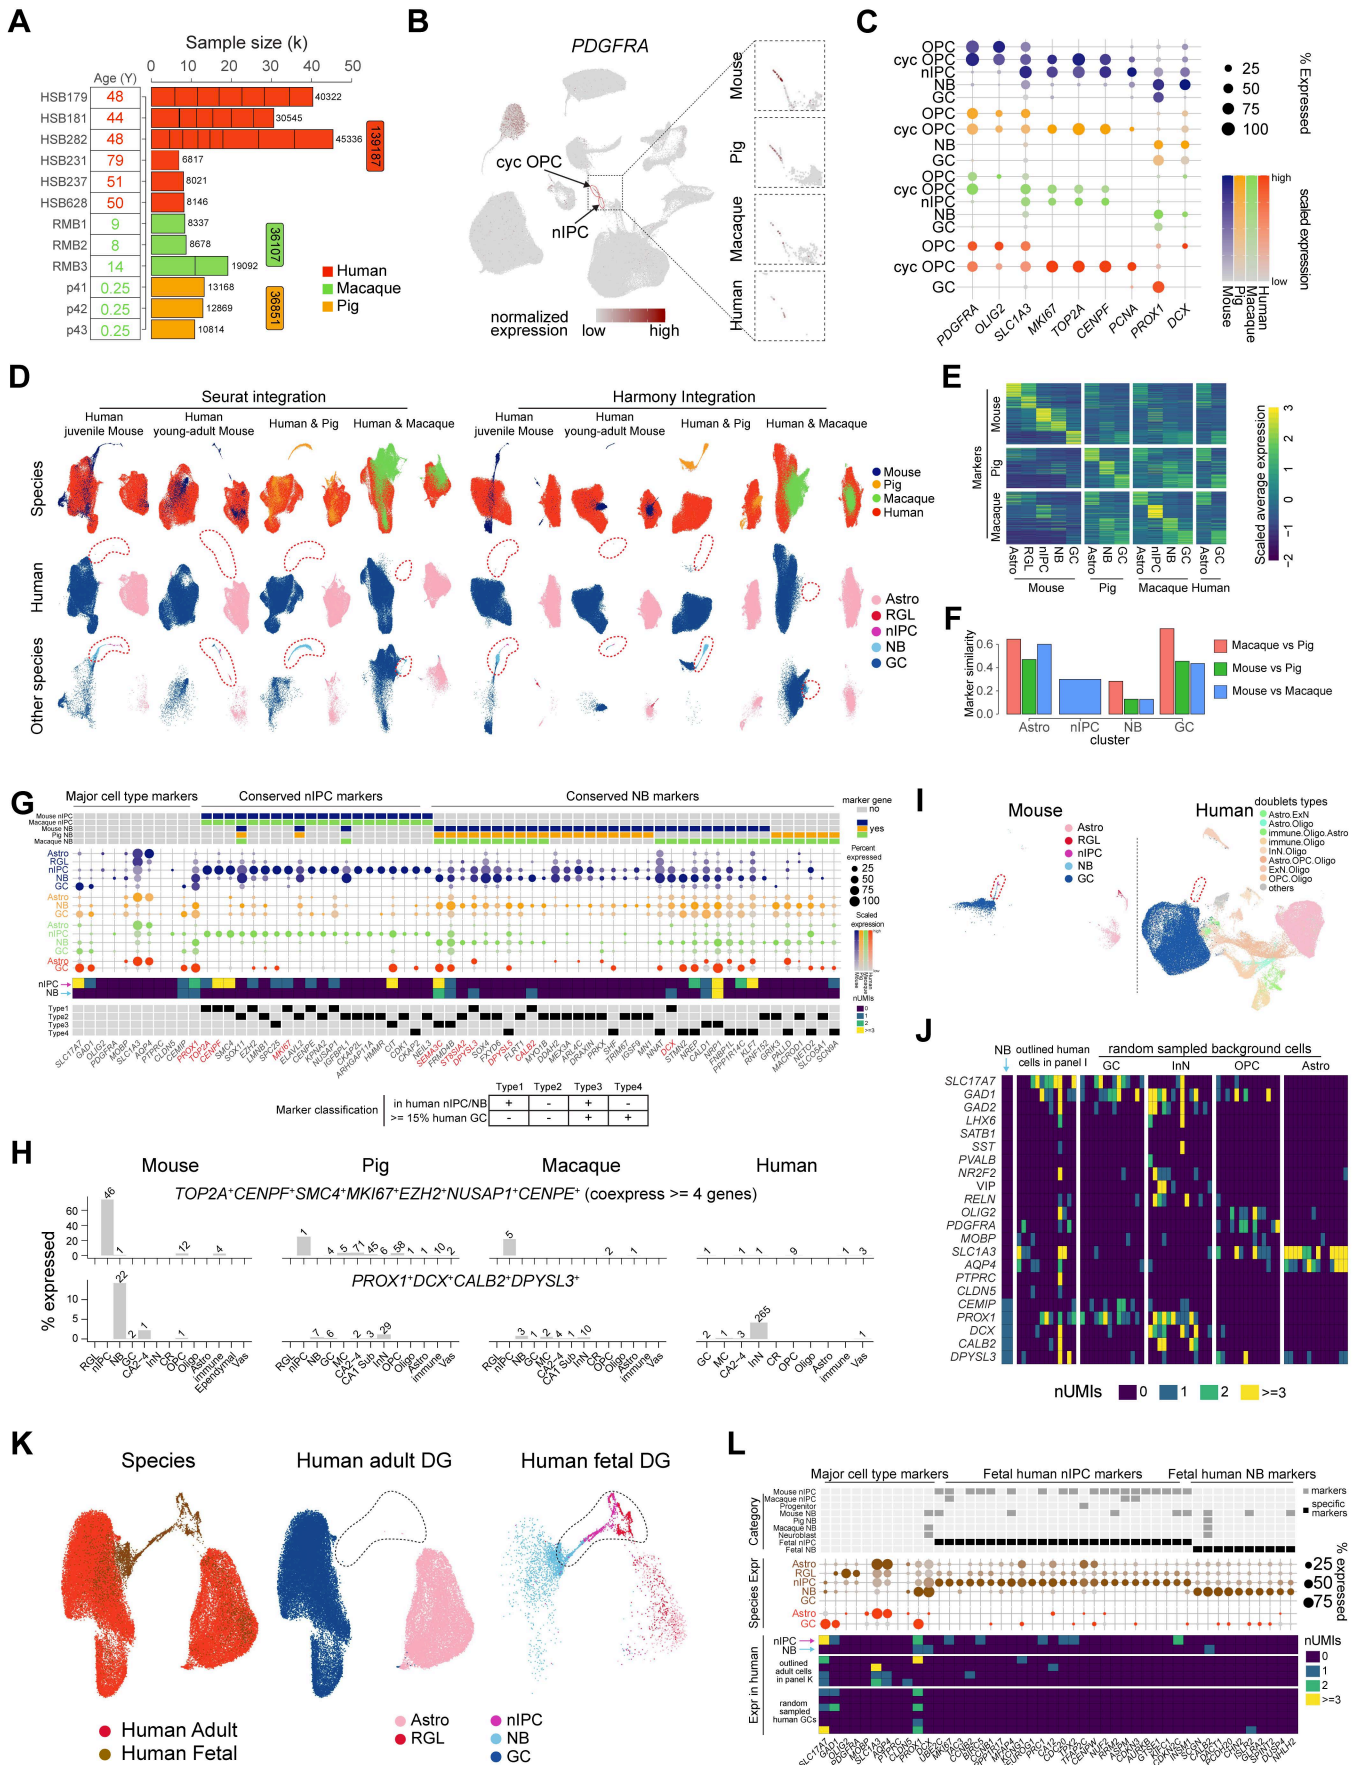

**Figure S2 (related to Figure 2). Cross-species comparison of hippocampal molecular taxonomy.**

**(A)** Donor ages and sample sizes. Donors are shown on the y-axis and technical replicates are represented by bar segments.

**(B)** The integration was sensitive enough to identify the cycling oligodendrocyte precursor cells (cyc OPCs), which were close to nIPC domain but marked by an oligodendrocyte precursor marker *PDGFRA*.

**(C)** Expression of selective OPC, cell cycle markers, as well as *DCX* and *PROX1*, in the granule cell lineage and OPC cells.

**(D)** Pair-wise integration of astrocytes and granule cell lineage between human and each of the other species using Seurat (left) and Harmony (right). The nIPC and neuroblast domains are outlined.

**(E)** Scaled average expression of markers across species with rows representing genes and columns denoting cell types.

**(F)** Similarity of cluster markers measured by the proportion of shared markers.

**(G)** Expression of species-conserved nIPC and neuroblast markers. Top panel: marker categories. Middle dot plot: expression of the conserved markers across species. Middle heatmap: expression of the markers in the human nIPC and neuroblast. Bottom panel: classification of the markers based on their expression in human neurogenic cells and background granule cells.

**(H)** Co-expression of type 1 markers identified in panel G across species.

**(I)** Integration of human and mouse astrocytes and the granule cell lineage along with previously removed human DG doublets.

**(J)** Expression of major cell type markers and several key neuroblast markers in the human cells outlined in panel I as well as some randomly sampled cells from other cell types. The human neuroblast cell was put on the left for reference.

**(K)** Integration of adult human DG data and fetal human DG data (Zhong et al., 2020).

**(L)** Top panel: categories of fetal human markers. Middle panel: expression of these markers in fetal and adult humans. Bottom heatmap: expression of the markers in human with the identified human nIPC and neuroblast arranged on the top for positive controls.



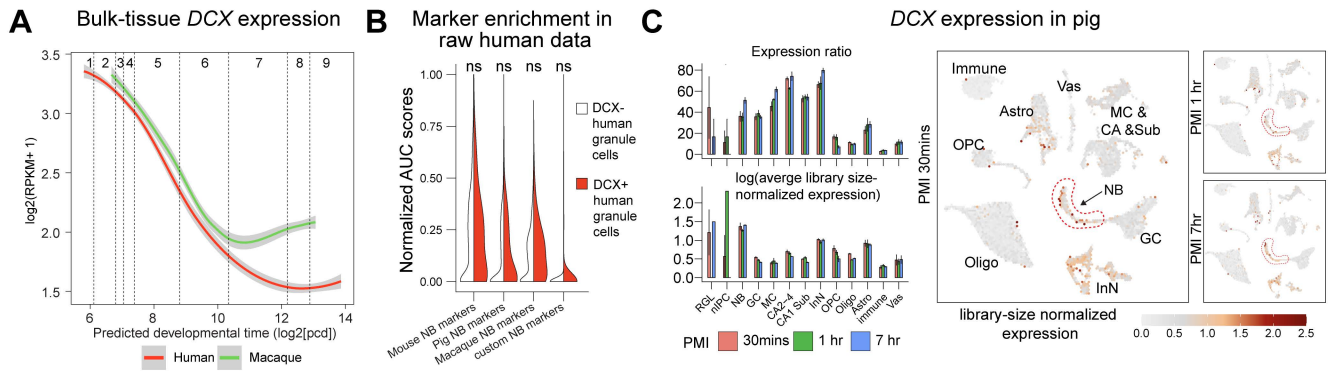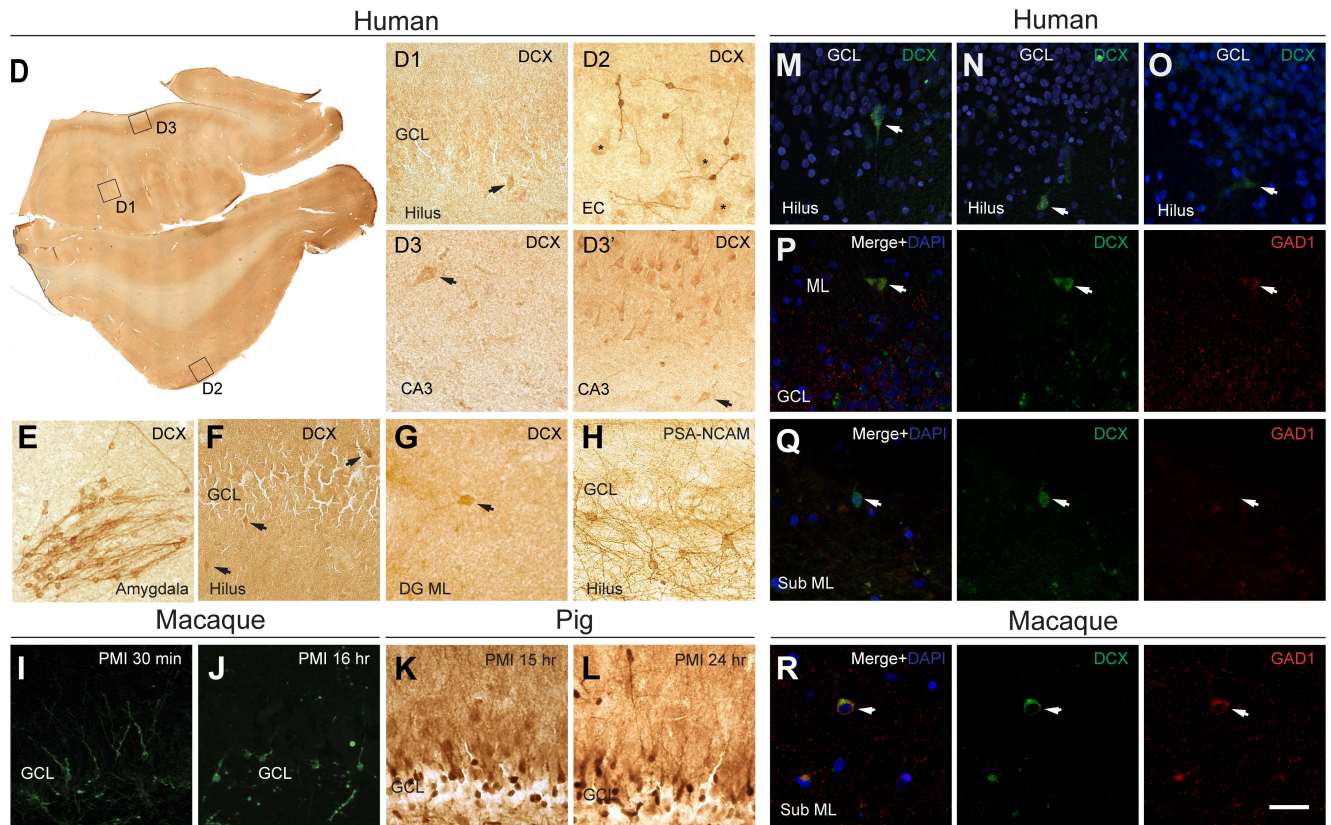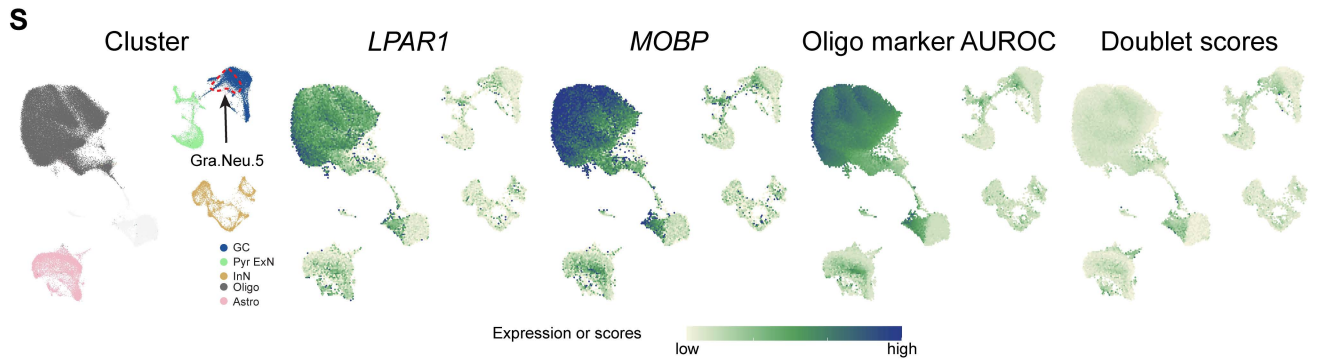

**Figure S3 (related to Figures 3). Cross-species comparison of the *DCX* expression.**

**(A)** Line plots visualizing the expression pattern of *DCX* along the predicted developmental time (Li et al., 2018; Zhu et al., 2018). Dashed lines represent the segregation of nine developmental stages described previously (Li et al., 2018).

**(B)** Enrichment of different sets of neuroblast markers in *DCX*<sup>+</sup> compared to *DCX*<sup>-</sup> cells in the raw human data prior to down-sampling. Significance was tested using one-tailed Wilcoxon rank sum test (ns: not significant).

**(C)** Left: Expression ratio and library size normalized expression of *DCX* in pig hippocampus at 30 mins, 1 hour and 7 hours postmortem interval (PMI). Right: UMAP showing normalized expression of *DCX* in pig hippocampus across postmortem intervals.

**(D)** Panoramic view of the human hippocampus immunolabeled for *DCX* (*DCX*-IL) indicating the location of panels D1-D3. D1, *DCX*-IL dentate gyrus illustrating the lightly labeled cells (arrow) occasionally found around the granule cell layer (GCL). D2, high magnification of the EC layer 2 showing cells clearly immunolabeled by *DCX*; ghostly, lightly stained cells with pyramidal morphology are marked with asterisks. D3, Lightly *DCX*-IL cell (arrow) in the stratum oriens of CA3. D3', Same cell (arrow) in the context of other lightly labeled cells in CA3, suggesting possible background staining.

**(E)** *DCX*-IL reveals numerous clearly immunoreactive cells in the human amygdala.

**(F-G)** examples of lightly *DCX* labeled cells typically located in the hilus, putative SGZ and molecular layer of the DG (arrows).

**(H)** PSA-NCAM in the human hippocampus labels numerous cells, especially in the hilus of the DG, revealing lack of specificity to label neuroblasts or immature neurons.

**(I-L)** Effects of PMI on *DCX* immunolabeling. I, J, *DCX*-IL cells in the GCL of rhesus macaque after 30 minutes and 16 hours PMI. K, L, *DCX*-IL cells in the GCL of domestic pig after 15 and 24 hours PMI. Reduced number of *DCX*-IL cells and increase in dendritic varicosities were observed with increased PMIs, but a sizeable number of cells could be detected. Pig showed occasional cells labeled in the molecular layer and a more immature, less consolidated granule cell layer and numerous cells immunolabeled for *DCX* in the subgranular zone (SGZ) but also in the hilus, as expected by the young age and the relatively protracted DG development in pigs, as previously described (Guidi et al., 2011).

**(M-O)** Examples of *DCX*-IL in the GCL and hilar region of the human.

**(P-R)** Immunofluorescence labeling of *DCX* and *GAD1* in the hippocampus of human (P, Q) and rhesus macaque (R). Notice colocalization of *DCX* and *GAD1* in one cell (arrow) located in the molecular layer (ML) of the DG of the human (P) and in one cell (arrow) in the molecular layer of the subiculum (Sub ML) of the rhesus (R). Panel Q illustrates a *DCX*-IL cell located in the Sub ML in the human immunonegative for *GAD1*. Scale bar represents 2.2 mm in D, 500  $\mu$ m in D1, 40  $\mu$ m in D2, 330  $\mu$ m in D3, 70  $\mu$ m in D3', 450  $\mu$ m in E, 800  $\mu$ m in F, 45  $\mu$ m in G, 80  $\mu$ m in H, 50  $\mu$ m in I and J, 35  $\mu$ m in K, 50  $\mu$ m in L, 40  $\mu$ m in M, 50  $\mu$ m in N, 35  $\mu$ m in O, P, 25  $\mu$ m in Q and 30  $\mu$ m in R.

**(S)** From left to right: UMAP visualizing the clusters identified in Ayhan et al., 2021, expression of *LPAR1* and *MOBP* (an oligodendrocyte marker), AUC scores of the top 50 oligodendrocyte markers and the doublet scores. The outlined cell populations represent the "Gra.Neu.5" cluster, which suggested to be a neural progenitor cluster by the original study.

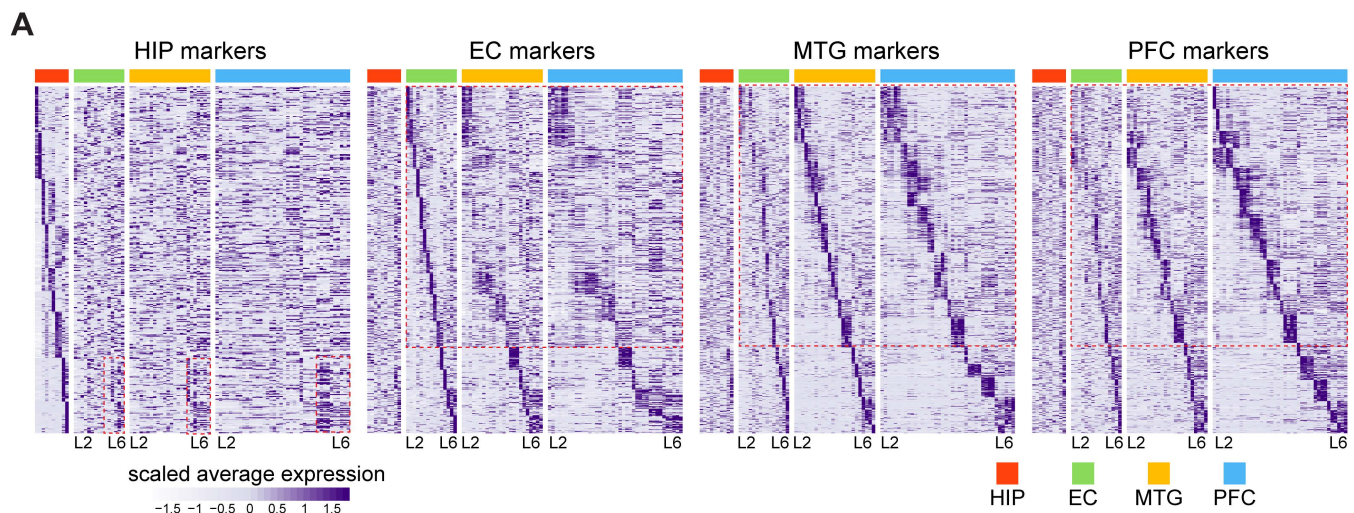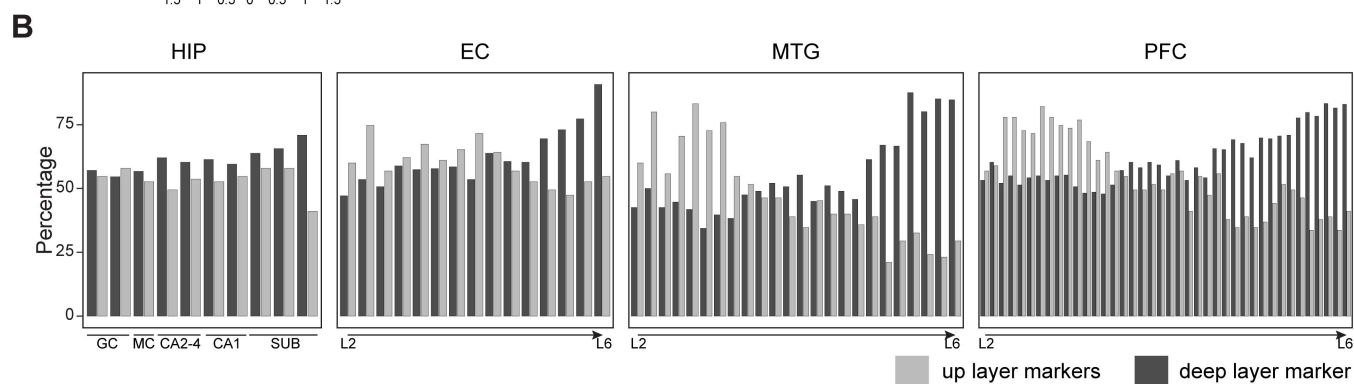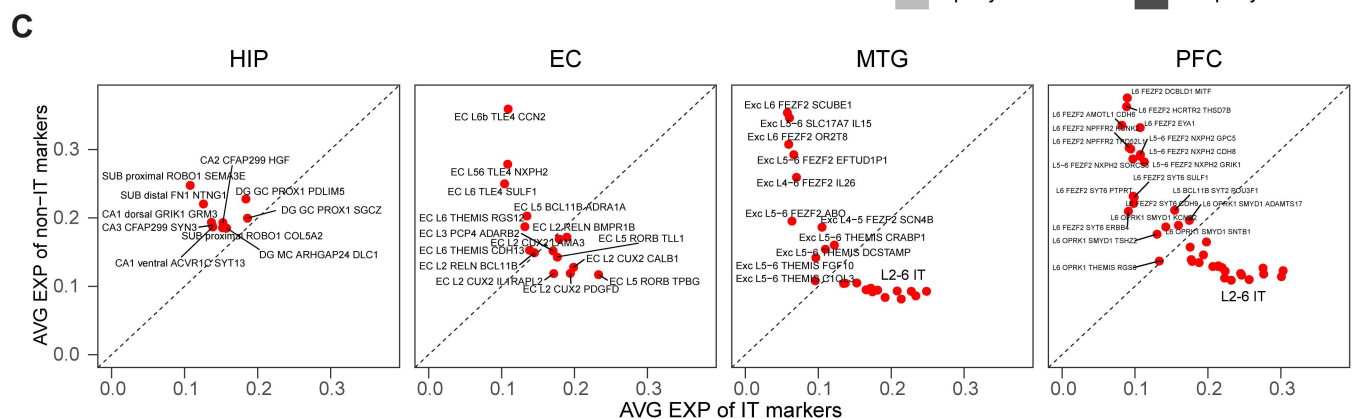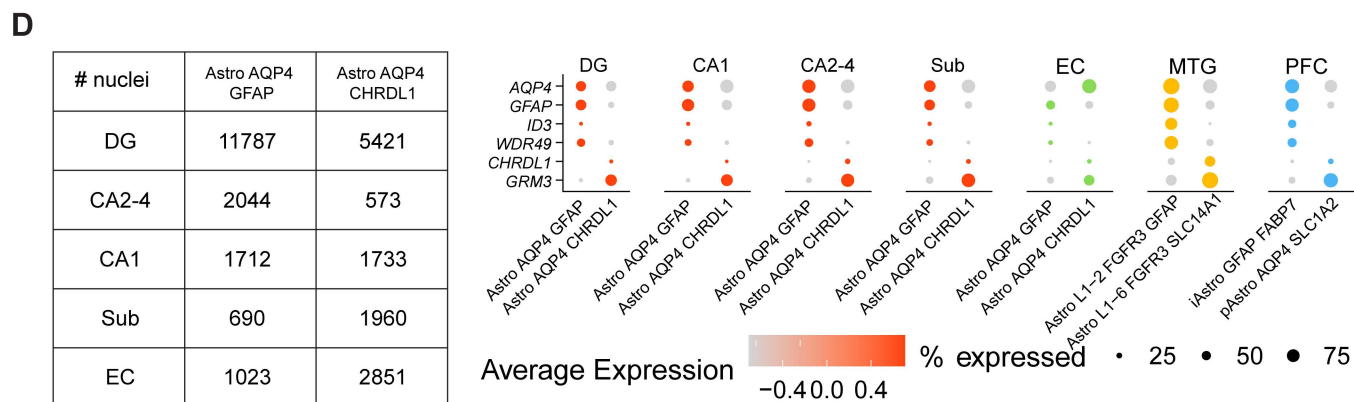

**Figure S4 (related to Figure 5). Transcriptome comparison of ExN between hippocampus, EC and neocortex.**

**(A)** Heatmap depicting the expression of marker genes from a certain region (rows) across subtypes (columns) of all the four regions: HIP, EC, MTG and PFC. The relative expression enrichment of hippocampal marker genes in deep layers of EC, MTG and PFC, and the upper layer divergence between EC and neocortex are outlined.

**(B)** Bar plots denoting the percentages of neocortical upper- (lightgrey) and deep- (black) layer marker genes that were expressed in each subtype of HIP, EC, MTG, and PFC.

**(C)** Scatter plots showing the average expression of intratelencephalic (IT) neuron markers (x axis) versus that of non-IT markers (y axis) in each subtype of HIP, EC, MTG and PFC.

**(D)** Left panel: table summarizing the number of cells of each astrocyte subtype across all subregions. Dot plots visualizing the expression of general astrocyte marker (*AQP4*), interlaminar (*GFAP*, *ID3*, *WDR49*) and protoplasmic astrocyte markers (*CHRD1*, *GRM3*) across all the regions surveyed.



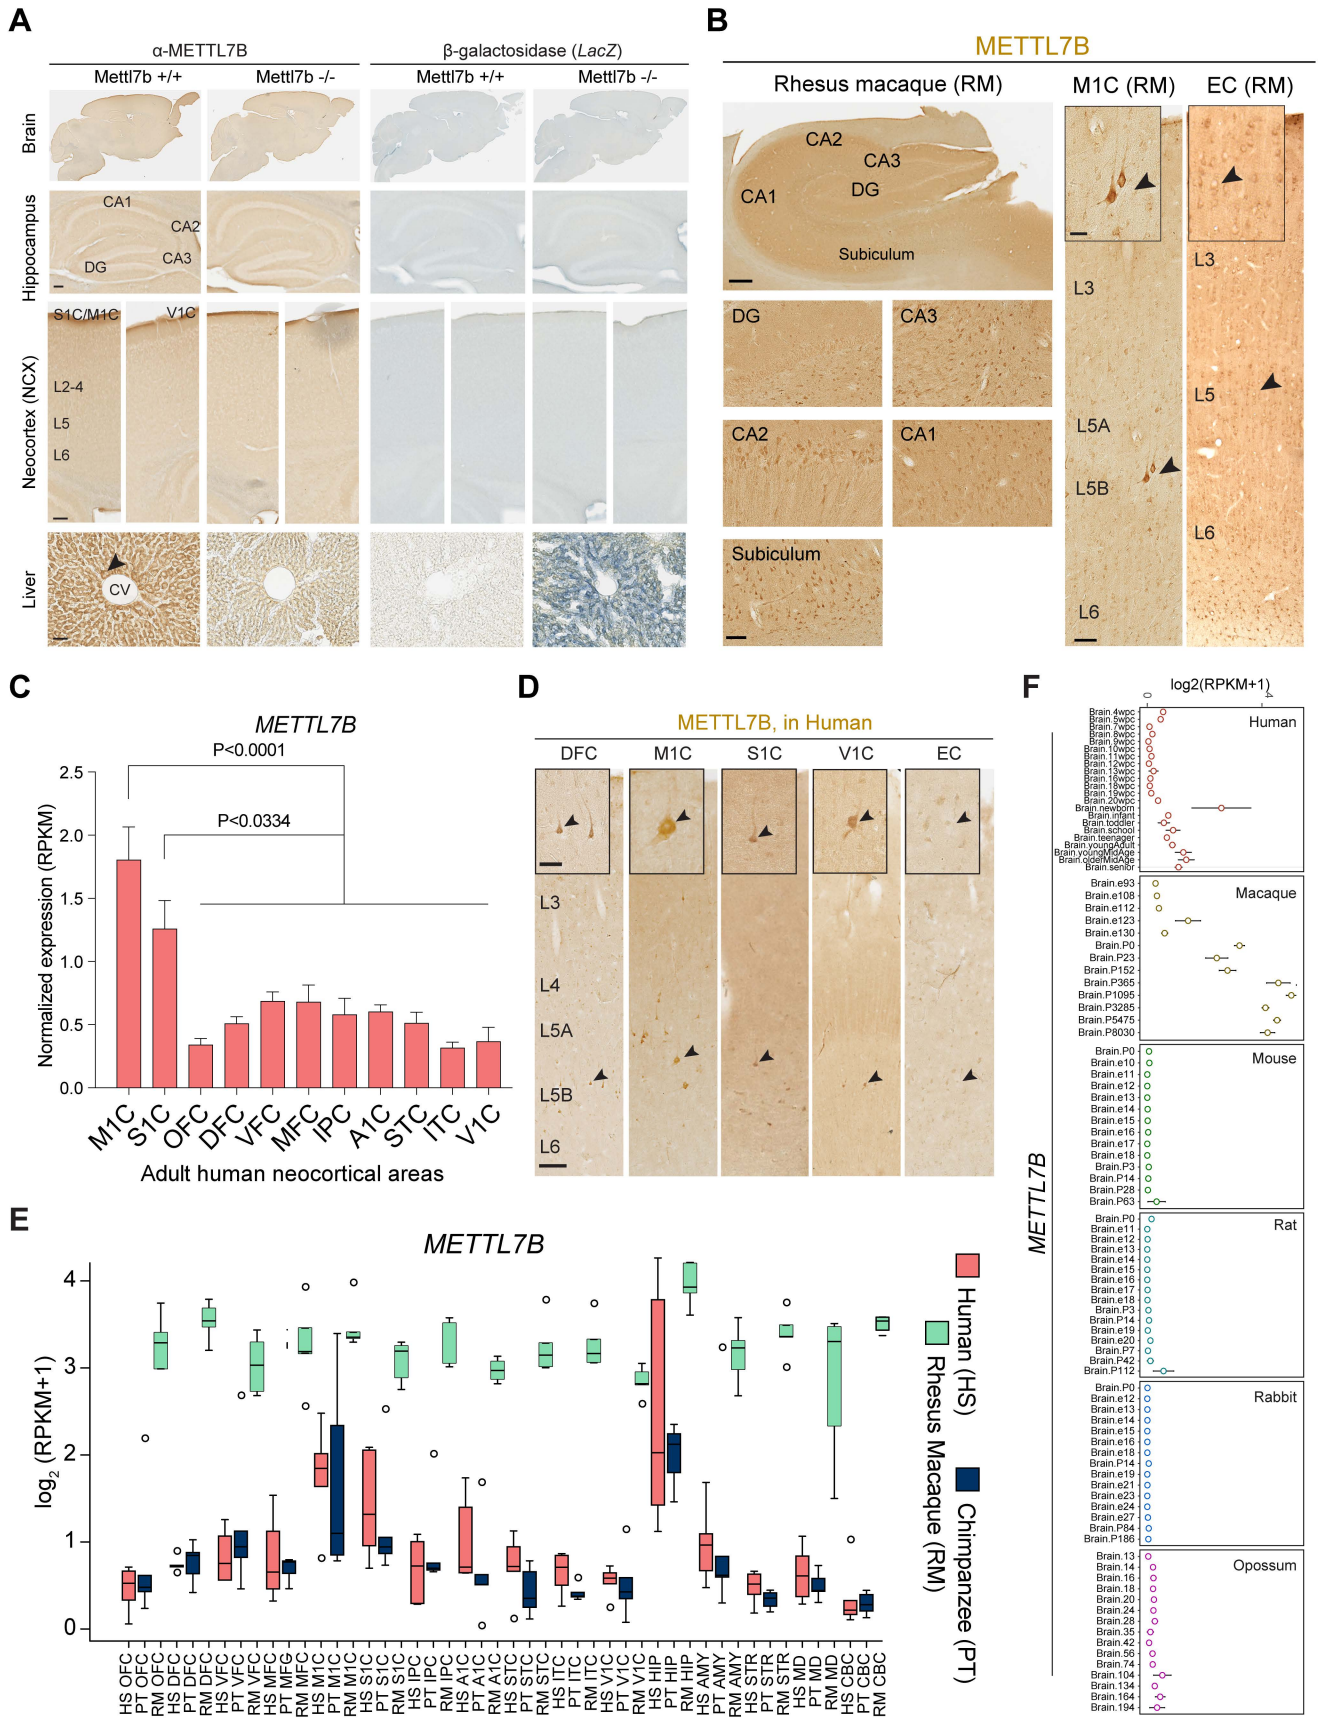

**Figure S5 (related to Figure 6). *METTL7B* is expressed in human and macaque brain but not mouse and pig brain.**

**(A)** Immunostaining of Mettl7b protein and lacZ expression in brain and liver. No expression was observed in the adult mouse brain. Scale bars: brain = 100  $\mu\text{m}$ ; liver = 50  $\mu\text{m}$ . CV = central vein.

**(B)** *METTL7B* immunolabeling of hippocampus, primate motor cortex and EC in rhesus macaque brains. Note labeling of hippocampal neurons, Betz cells, and pyramidal neurons in EC. Scale bars = 100  $\mu\text{m}$ ; inset = 50  $\mu\text{m}$ .

**(C)** RNA-seq expression of *METTL7B* in human neocortex. One-way ANOVA with post-hoc Dunnett's adjustment, all groups n=6, except MFC n=5. Data are means  $\pm$  SEM.

**(D)** Prominent immunolabeling of layer 5B (L5B) pyramidal neurons (arrowheads), including Betz and Meynert cells in M1C and V1C, respectively. Scale bars = 150  $\mu\text{m}$ ; insets = 50  $\mu\text{m}$ .

**(E)** RNA-seq expression of *METTL7B* homologs in human, chimpanzee, and rhesus macaque brain regions (Sousa et al., 2017).

**(F)** RNA-seq expression of *METTL7B* in the brain (forebrain/cerebrum) of multiple species at different developmental stages. Expression data was obtained from Cardoso-Moreira et al. 2019. AMY, amygdala; A1C, primary auditory cortex; CBC, cerebellar cortex; DFC, dorsolateral prefrontal cortex (aka DLPFC); EC, entorhinal cortex; IPC, posterior inferior parietal cortex; ITC, inferior temporal cortex; M1C, primary motor cortex; MD, mediodorsal nucleus of the thalamus; MFC, medial prefrontal cortex; OFC, orbital prefrontal cortex; S1C, primary somatosensory cortex; STC, superior temporal cortex; STR, striatum; V1C, primary visual cortex; VFC, ventrolateral prefrontal cortex.

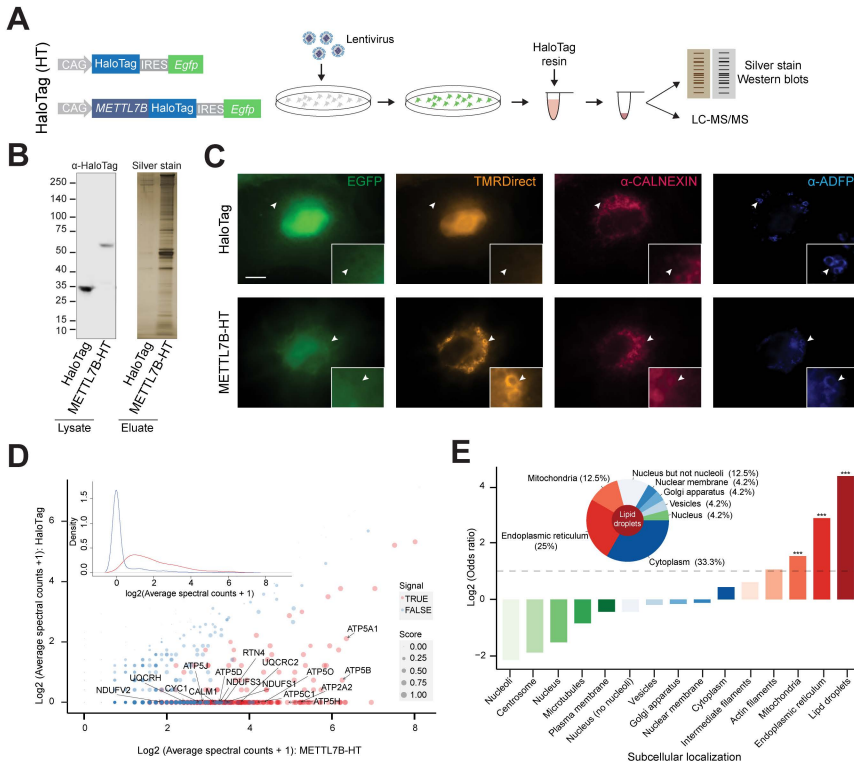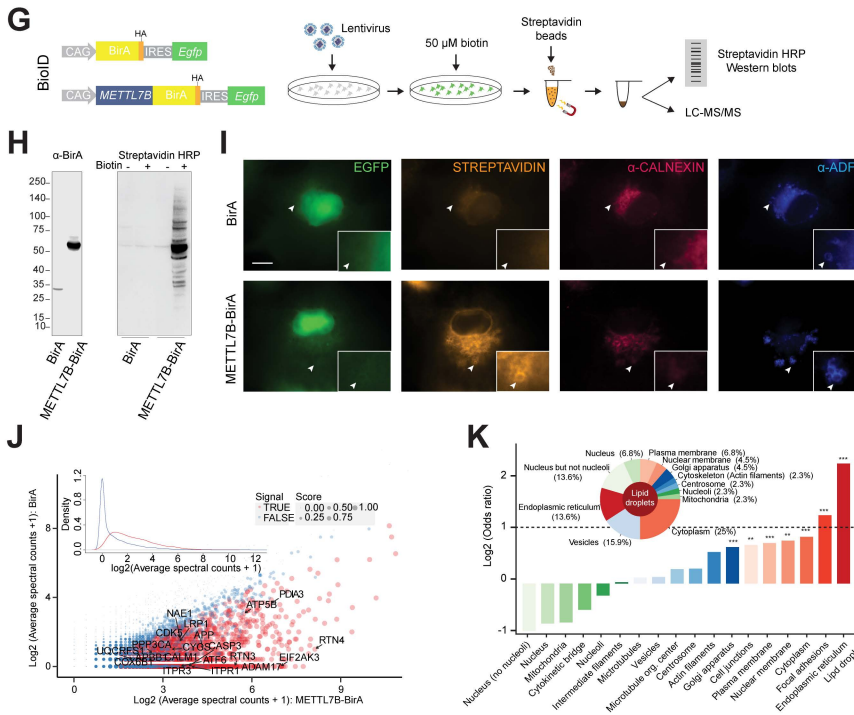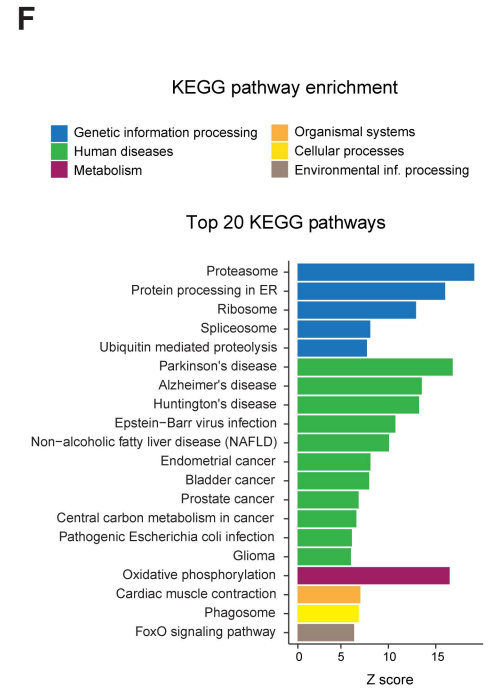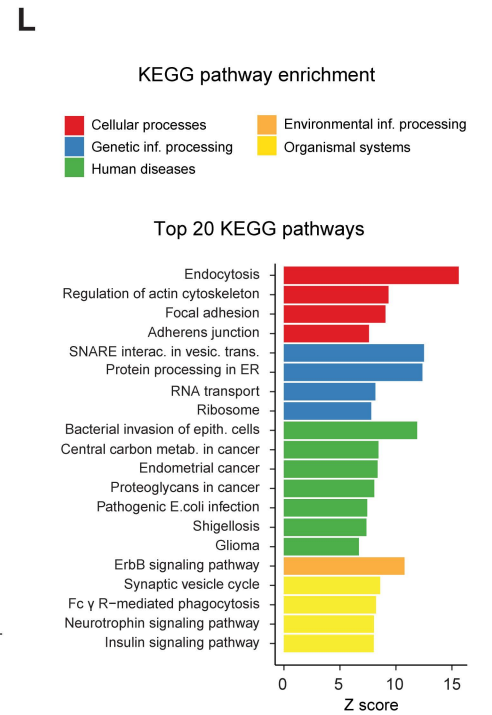

**Figure S6 (related to Figure 7). KEGG pathway enrichment of METTL7B interacting proteins.**

**(A)** Schematic of HaloTag (HT) pulldown design.

**(B)** Immunoblot validation of HT proteins and silver stain of pulldown eluates showing more proteins captured in METTL7B-HT sample.

**(C)** Immunofluorescence staining showing that METTL7B fusion protein (TMR-Direct) co-localizes with CALNEXIN and ADFP, markers of the ER and LD, respectively (Turro et al., 2006). Scale bars = 10  $\mu$ m

**(D)** SAINT analysis distinguishes true METTL7B interactors (red) from false ones (blue) based on MS spectral counts. The figure shows the average spectral counts in 3 test experiments (x axis) and 3 control experiments for all detected proteins. The inset clarifies separation between true METTL7B interactors (red curve) and the false ones (blue curve) in terms of spectral count distribution.

**(E)** Fold-enrichment test for major subcellular compartments cataloged in Human Protein Atlas database (Uhlen et al., 2015) and mammalian cytoplasmic lipid droplet proteomes (Hodges and Wu, 2010). The inset shows subcellular composition (%) of LD associated proteins. \*\*\*P<0.001.

**(F)** KEGG pathway enrichment analysis showing molecular pathways involving true interactors are associated with three neurodegenerative diseases: Alzheimer's, Parkinson's, and Huntington's disease.

**(G)** Schematic of BioID pulldown experimental design.

**(H)** Immunoblot validation of BioID proteins ( $\alpha$ -BirA) and pulldown efficiency (STREPTAVIDIN-HRP) after supplementing cell culture media with 50  $\mu$ M biotin for 24 hours.

**(I)** METTL7B-expressing cells exhibit vast biotinylation of endogenous proteins (STREPTAVIDIN) which co-localize with CALNEXIN and ADFP, ER and LD markers, respectively. Scale bars = 10  $\mu$ m

**(J)** SAINT analysis distinguishes true METTL7B interactors (red) from false ones (blue) based on MS spectral counts. The figure shows the average spectral counts in 3 test experiments (x axis) and 3 control experiments for all detected proteins. The inset clarifies separation between true METTL7B interactors (red curve) and the false ones (blue curve) in terms of spectral count distribution.

**(K)** Fold-enrichment test for major subcellular compartments cataloged in Human Protein Atlas database (Uhlen et al., 2015) and mammalian cytoplasmic lipid droplet proteomes (Hodges and Wu, 2010). The inset shows subcellular composition (%) of LD associated proteins. \*\*\*P<0.001, \*\*P<0.01.

**(L)** KEGG pathway enrichment analysis.



**A**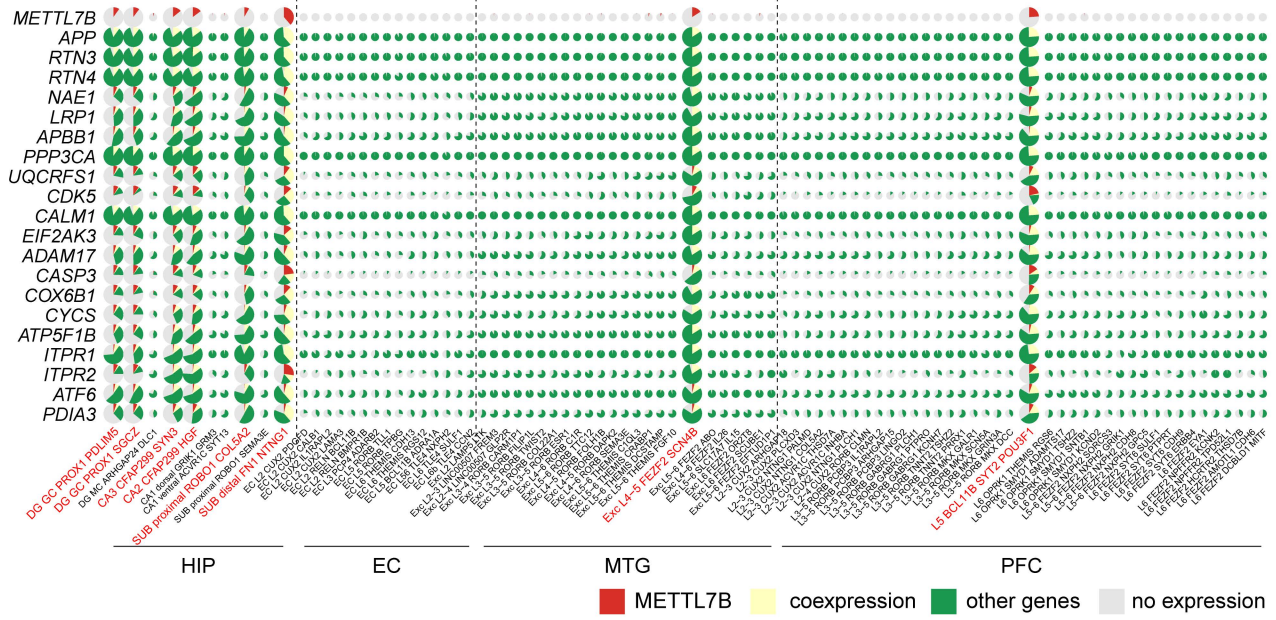**B**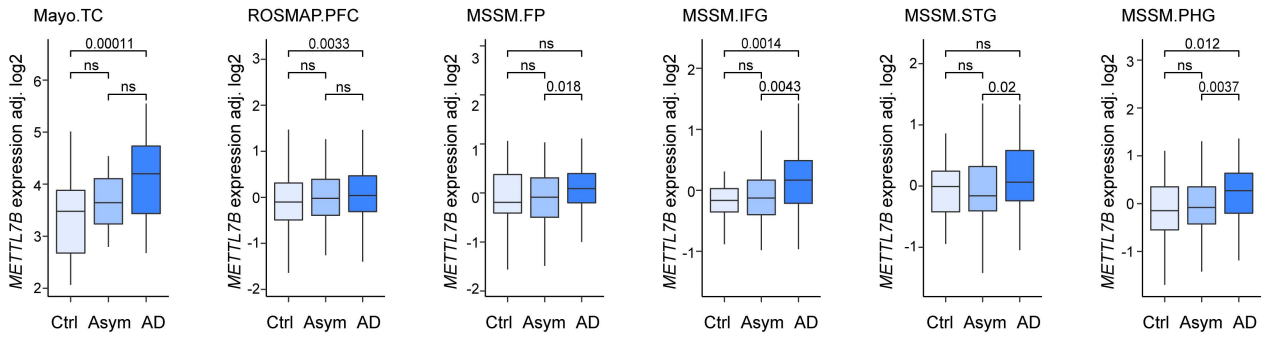**C**

METTL7B expression comparison between AD and Ctrl samples

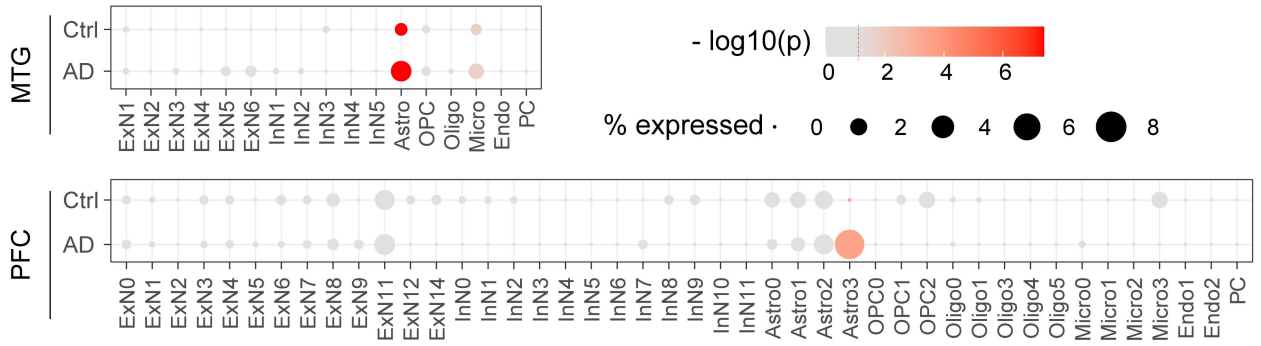**D**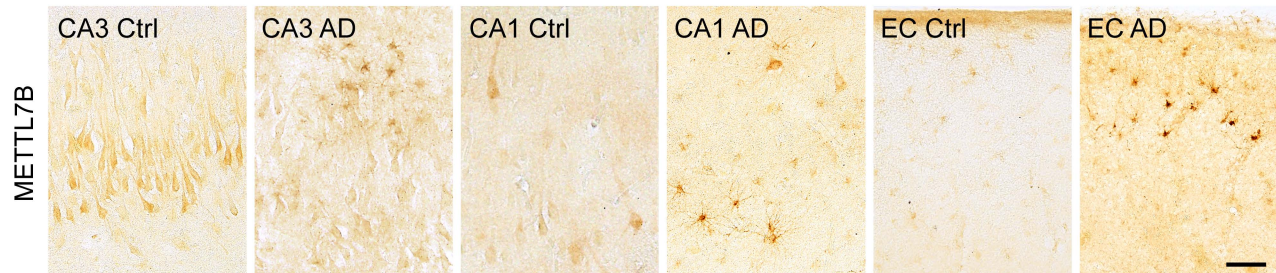

**Figure S7 (related to Figure 7). *METTL7B* expression in control and Alzheimer's disease brains.**

**(A)** Pie charts showing the percent of cells expressing *METTL7B* but not certain *METTL7B* interactor (red), the percent of cells expressing each of the *METTL7B* interactors but not *METTL7B* (green), as well as the percent of cells co-expressing *METTL7B* and certain interactor (yellow) out of all cells within the subtypes of HIP, EC, MTG and PFC. Each row represents a gene and each column denotes a subtype.

**(B)** *METTL7B* expression from bulk tissue RNA-seq of control (Ctrl), asymptomatic AD (Asym), and AD from several brain regions. TC, temporal cortex; PFC, prefrontal cortex; FP, frontal pole; IFG, inferior frontal gyrus; STG, superior temporal gyrus; PHG, parahippocampal gyrus. Data analyzed from Swarup Lab (<http://swaruplab.bio.uci.edu:3838/bulkRNA/>).

**(C)** Expression of *METTL7B* across cell types from Ctrl and AD brains. The sizes of dots represent the expression ratio of *METTL7B* and the color gradients represent significance of *METTL7B* enriched in AD subtypes (measured by Fisher's exact test, two-sided). All dots with p value smaller than 0.05 are colored in red gradients. Top: prefrontal cortex (Mathys et al., 2019). Bottom: middle temporal cortex (**STAR Methods**).

**(D)** Immunostaining of *METTL7B* in CA3, CA1 and EC in both control and AD brains. Scale bar is 60  $\mu$ m for all panels. Astro, astrocyte; OPC, oligodendrocyte progenitor cell; Oligo, oligodendrocyte; Micro, microglia; Endo, endothelial cell; PC, pericyte.
